# Supplementary material for: The spatial frequency representation predicts category coding in the inferior temporal cortex
Source: eLife. 2025 Sep 12;13:RP93589. doi: 10.7554/eLife.93589 (PMC12431771; doi:10.7554/eLife.93589)
Supplement: Figure 1—source data 1. [file elife-93589-fig1-data1.xlsx]

## Sheet: Figure 1
C	R1	-19.0364	-17.7842	-16.6009	-15.4362	-14.3379	-13.2734	-12.2511	-11.3144	-10.4173	-9.58873	-8.79269	-8.08119	-7.42213	-6.85559	-6.31697	-5.80553	-5.35789	-4.93274	-4.50566	-4.1458	-3.81735	-3.53804	-3.27728	-3.03215	-2.83501	-2.67034	-2.5865	-2.53064	-2.45538	-2.3669	-2.41584	-2.42687	-2.47368	-2.55915	-2.61265	-2.67709	-2.76488	-2.83717	-2.9168	-3.00621	-3.01517	-3.08141	-3.1667	-3.17959	-3.15935	-3.13769	-3.10193	-2.97043
	R3	-23.9271	-22.8242	-21.703	-20.6604	-19.6292	-18.6355	-17.7276	-16.8565	-16.046	-15.2617	-14.583	-13.9672	-13.439	-12.9222	-12.4446	-12.0784	-11.6579	-11.2582	-10.9332	-10.5928	-10.3113	-10.0429	-9.77537	-9.51301	-9.25396	-9.01233	-8.74761	-8.4549	-8.16275	-7.87201	-7.5656	-7.23695	-6.97686	-6.62973	-6.30023	-5.98347	-5.74714	-5.50171	-5.24371	-5.01367	-4.75727	-4.53174	-4.36391	-4.18409	-4.06259	-3.87313	-3.76663	-3.65811
	R5	-19.054	-17.6894	-16.3441	-15.0903	-13.8718	-12.7368	-11.6886	-10.6998	-9.82952	-9.01599	-8.35588	-7.74728	-7.26362	-6.86416	-6.54115	-6.3121	-6.12006	-6.02787	-5.9661	-5.96431	-5.99146	-6.08199	-6.13076	-6.21159	-6.27009	-6.42899	-6.53152	-6.63272	-6.70676	-6.75293	-6.71328	-6.70869	-6.68603	-6.62868	-6.51999	-6.39187	-6.26197	-6.0889	-5.89989	-5.76024	-5.55921	-5.31559	-5.12089	-4.90487	-4.72835	-4.58281	-4.37169	-4.17784
d	Population	0.00218782	0.00595122	0.00481581	0.00340837	-0.00377281	-0.00483083	-0.0100144	-0.00789865	-0.00753562	-0.00173318	0.00227349	0.00656754	0.0068074	0.00171563	0.000685167	-0.00184988	0.00263459	0.003929	0.00529127	0.00522375	0.0083214	0.0107111	0.00859002	0.0101478	0.00970729	0.0150036	0.0137951	0.0163833	0.0148035	0.0207356	0.0454579	0.0800451	0.113847	0.138618	0.172335	0.206661	0.232553	0.23697	0.235328	0.22967	0.227464	0.211064	0.199052	0.182067	0.174747	0.167575	0.164301	0.163416
	Single	-0.0822696	-0.0427891	-0.00432787	-0.00345359	-0.00195612	-0.000676458	0.000278739	0.00133699	0.000554546	0.00041101	0.000153216	-0.000373295	-0.00110144	-0.000128751	-0.000649009	-0.00103392	-0.00105563	-0.00117861	-0.00134398	-0.00158405	-0.00126318	-0.000254892	0.00123917	0.00129577	0.00218105	0.00319273	0.00353149	0.00452809	0.00747086	0.00993339	0.0121656	0.0154932	0.0193967	0.0221791	0.0263293	0.0308081	0.0342545	0.0363569	0.0382014	0.0401546	0.0398106	0.0395811	0.0393579	0.0398928	0.0377599	0.038227	0.0374165	0.0372893
e	R1	0.167353	0.218712	0.149584	0.136602	0.153262	0.167603	0.223998	0.20183	0.166255	0.150424	0.179537	0.181648	0.183863	0.186142	0.118594	0.197185	0.185926	0.198907	0.225104	0.153189	0.146246	0.145076	0.17232	0.168843	0.154035	0.14323	0.204216	0.200171	0.216583	0.197822	0.263817	0.270988	0.337233	0.375721	0.464831	0.523624	0.51029	0.528899	0.560742	0.528693	0.551152	0.529739	0.545005	0.518829	0.554063	0.549778	0.561368	0.556534
	R2	0.18618	0.152226	0.163385	0.125007	0.153892	0.126024	0.147945	0.127179	0.166636	0.140752	0.178799	0.178109	0.205935	0.192978	0.1359	0.177725	0.181883	0.212406	0.16054	0.167871	0.168254	0.190263	0.207524	0.207751	0.230663	0.231939	0.2441	0.291699	0.20793	0.243875	0.288273	0.269731	0.249818	0.345697	0.355162	0.388071	0.374728	0.414293	0.408828	0.392993	0.38699	0.3999	0.377554	0.406486	0.368477	0.352719	0.389191	0.439156
	R3	0.182006	0.209567	0.187445	0.195787	0.184304	0.173952	0.193478	0.240856	0.246109	0.259741	0.214984	0.201264	0.162345	0.144795	0.174653	0.205493	0.17683	0.181736	0.193538	0.150287	0.167037	0.17835	0.200853	0.149345	0.166281	0.209146	0.194482	0.191778	0.182713	0.240468	0.283321	0.233201	0.243172	0.273193	0.339158	0.348056	0.324884	0.361593	0.344684	0.342997	0.308605	0.334129	0.276947	0.275536	0.290311	0.282933	0.292459	0.362161
	R4	0.15193	0.178298	0.147275	0.149876	0.161535	0.164278	0.153891	0.16424	0.166164	0.18764	0.222542	0.274499	0.216927	0.20676	0.205892	0.189892	0.135524	0.146929	0.206469	0.168855	0.221416	0.178628	0.16256	0.188191	0.152097	0.194402	0.170564	0.212375	0.181803	0.238032	0.244451	0.2694	0.288719	0.324289	0.359003	0.389992	0.352697	0.376108	0.365623	0.3414	0.340924	0.311922	0.324752	0.304707	0.335661	0.306096	0.336489	0.345802
	R5	0.187757	0.162298	0.142334	0.160369	0.168233	0.138167	0.133365	0.195232	0.179176	0.185338	0.214919	0.219017	0.206389	0.207371	0.185672	0.181674	0.181014	0.17009	0.180357	0.169979	0.168536	0.192795	0.228266	0.191729	0.254176	0.20277	0.218363	0.260134	0.201672	0.194766	0.201631	0.216319	0.2438	0.238823	0.264658	0.312089	0.369646	0.348767	0.34506	0.429732	0.399638	0.328004	0.315343	0.313579	0.335673	0.322472	0.292522	0.348606
[truncated: 852 more columns]
