# Supplementary material for: The spatial frequency representation predicts category coding in the inferior temporal cortex
Source: eLife. 2025 Sep 12;13:RP93589. doi: 10.7554/eLife.93589 (PMC12431771; doi:10.7554/eLife.93589)
Supplement: Figure 2—source data 1. [file elife-93589-fig2-data1.xlsx]

## Sheet: Figure 2
a	R1	80.2515	80.2515	89.1957	84.7236	80.2515	84.7236	84.7236	86.9597	84.7236	80.2515	80.2515	86.9597	82.4875	82.4875	86.9597	82.4875	84.7236	80.2515	82.4875	80.2515	84.7236	89.1957	84.7236	84.7236	86.9597	91.4318	86.9597	80.2515	86.9597	86.9597	84.7236	89.1957	84.7236	89.1957	89.1957	86.9597	82.4875	80.2515	82.4875	84.7236	86.9597	82.4875	80.2515	84.7236	89.1957	80.2515	84.7236	86.9597
	R2	81.0807	83.3167	92.261	85.5528	85.5528	87.7889	81.0807	81.0807	81.0807	83.3167	81.0807	81.0807	81.0807	81.0807	81.0807	87.7889	83.3167	92.261	85.5528	83.3167	87.7889	92.261	92.261	92.261	81.0807	90.0249	83.3167	81.0807	85.5528	87.7889	90.0249	92.261	85.5528	81.0807	90.0249	81.0807	87.7889	81.0807	83.3167	81.0807	83.3167	87.7889	85.5528	87.7889	83.3167	87.7889	81.0807	90.0249
	R3	82.6837	82.6837	91.628	89.3919	91.628	91.628	84.9198	87.1559	82.6837	93.8641	87.1559	82.6837	96.1001	96.1001	87.1559	89.3919	84.9198	91.628	84.9198	96.1001	82.6837	93.8641	93.8641	93.8641	91.628	96.1001	84.9198	89.3919	93.8641	84.9198	82.6837	93.8641	89.3919	91.628	87.1559	96.1001	82.6837	84.9198	87.1559	93.8641	87.1559	91.628	98.3362	98.3362	93.8641	82.6837	82.6837	84.9198
	R4	81.357	85.8292	92.5374	81.357	88.0652	83.5931	85.8292	90.3013	85.8292	90.3013	97.0095	83.5931	90.3013	83.5931	88.0652	83.5931	81.357	81.357	88.0652	88.0652	81.357	81.357	85.8292	90.3013	85.8292	83.5931	85.8292	81.357	97.0095	81.357	81.357	81.357	85.8292	81.357	81.357	81.357	90.3013	92.5374	88.0652	88.0652	83.5931	90.3013	88.0652	83.5931	83.5931	83.5931	92.5374	88.0652
	R5	91.7164	93.9524	91.7164	91.7164	98.4246	100.661	102.897	102.897	105.133	91.7164	89.4803	98.4246	100.661	102.897	91.7164	100.661	102.897	91.7164	91.7164	100.661	100.661	91.7164	89.4803	98.4246	100.661	91.7164	98.4246	105.133	96.1885	98.4246	100.661	96.1885	89.4803	89.4803	91.7164	111.841	100.661	93.9524	96.1885	93.9524	102.897	96.1885	96.1885	91.7164	98.4246	102.897	100.661	87.2442
b	Preferred SF	0.342741	0.346429	0.350869	0.348816	0.347943	0.340215	0.331476	0.314589	0.304325	0.293848	0.295637	0.295829	0.300232	0.30169	0.30996	0.319495	0.332194	0.348941	0.359596	0.365601	0.371833	0.364972	0.358071	0.345807	0.34226	0.332559	0.320127	0.307444	0.31829	0.317262	0.313577	0.306055	0.300007	0.326343	0.320399	0.313827	0.307276	0.306011	0.299972	0.322284	0.32089	0.30301	0.313282	0.326119	0.338927	0.342876	0.36371	0.37651
c	R1	0.93804	1.06739	1.00257	0.886549	0.923377	1.17802	1.05441	1.41978	1.04938	1.37396	1.15311	1.21854	1.95488	1.12336	0.996997	0.877987	1.02277	0.656547	0.987444	0.628644	0.432045	0.336995	1.1267	1.11699	1.13168	1.02056	1.38625	1.01737	1.01012	1.04704	0.989771	0.946682	1.00949	1.10558	1.15721	0.976365	0.867891	0.937366	0.999167	0.951467	0.992443	0.934829	1.0704	0.941385	0.984719	1.09489	0.949774	0.976432
	R2	0.85987	1.09129	1.08657	1.09114	1.02648	1.12185	0.994729	0.94154	0.924873	1.3542	1.17894	1.21487	1.86296	1.03738	1.08432	1.03666	1.22924	0.660827	0.989124	0.672552	0.415212	0.299169	1.04572	1.08879	1.09276	1.09841	1.0848	0.79084	0.793044	0.761317	0.702962	0.859022	1.03278	1.11199	1.0573	1.08377	1.03837	0.932579	0.985208	0.910501	1.0329	1.01981	0.975811	1.02364	1.18403	1.25811	1.25806	1.18023
	R3	1.18558	1.20281	1.13303	0.709239	1.07231	1.08415	0.994729	0.993848	1.03159	1.13938	1.09391	1.23564	2.22452	1.19833	0.934606	0.842492	1.34807	0.648844	0.913554	0.595191	0.355361	0.302607	0.998057	1.11864	1.12736	0.975385	1.09799	0.831065	0.831124	0.739701	0.739829	0.942475	1.05183	1.09337	1.09547	0.990531	0.918468	1.01888	1.03477	1.09022	1.0399	1.03989	0.908905	1.01444	1.08993	1.00991	0.989407	0.884538
	R4	0.951068	1.17891	1.07763	0.945652	1.0672	1.06261	0.977677	0.769672	0.969338	1.09556	1.18743	1.32197	2.30615	1.01926	1.04087	0.979397	1.06603	0.671955	0.965613	0.503194	0.354426	0.285414	1.10595	1.07993	1.00265	1.08376	1.22521	0.968766	0.854345	0.93244	0.856468	0.984951	1.025	1.09122	0.974219	0.951302	1.02744	0.89631	1.03749	0.955976	1.0805	0.934829	0.969588	1.02821	1.09958	0.873357	0.914721	0.917624
	R5	1.08135	0.908078	1.02581	1.08356	1.27585	1.09208	0.947784	1.00579	1.05629	1.09786	1.15136	1.29947	2.44647	1.13751	1.10607	1.16896	1.19032	0.591492	0.942942	0.572192	0.371259	0.398892	1.03402	1.04217	1.03472	0.921197	1.18926	0.921019	0.959233	0.89736	0.833512	0.942475	1.0451	1.08637	1.07395	1.03495	1.37933	1.1966	1.07399	1.32443	1.01624	0.996636	1.03182	0.945955	1.06947	1.01395	1.00823	0.925215
d	R1	0.846842	1.05146	0.98649	0	0.139003	0.504758	0.32684	0.605276	0.453544	0.430489	0.626316	0.568039	0.73538	0.82244	1.05764	0.772206	0.782683	0.151511	0.358536	0.347078	0.303927	0.333556	0.589315	0.521517	0.56405	0.666767	0.552835	0.432543	0.439267	0.398501	0.383245	0.538033	1.17865	1.18029	1.17802	1.2888	1.79777	1.04605	1.09872	1.28844	1.06146	1.24386	0.955896	1.11504	0.776177	0.472891	0.746365	0.660868
	R2	0.573247	0.533695	0.84352	0	0.142058	0.30701	0.215998	0.396045	0.262344	0.416875	0.461924	0.44588	0.612816	0.694606	0.946055	0.592377	0.566605	0.116415	0.372811	0.244628	0.164588	0.144426	0.387303	0.383659	0.40157	0.356982	0.347583	0.338467	0.379028	0.358421	0.394998	0.503439	1.17317	1.24218	1.24462	1.16187	1.95276	1.12915	1.22656	1.19066	1.0091	0.965732	1.05547	1.27041	0.647462	0.269596	0.555906	0.541771
	R3	0.560218	0.677076	0.779184	0.0886549	0.361904	0.399343	0.213156	0.485715	0.374618	0.683111	0.532798	0.433054	0.508638	0.744452	0.966001	0.610806	0.712279	0.257654	0.447541	0.371472	0.268391	0.261343	0.485541	0.427631	0.439686	0.433504	0.42592	0.385563	0.553438	0.424547	0.516547	0.519314	1.20868	1.17269	1.10802	1.09841	1.94591	1.17737	1.27385	1.22898	1.05903	1.09421	0.941411	1.37707	0.733715	0.376578	0.633864	0.614032
	R4	0.716558	0.939941	0.882837	0.10132	0.260418	0.524763	0.360945	0.732309	0.511348	0.525867	0.64176	0.508963	0.530781	0.920148	1.01913	0.968865	0.889153	0.416869	0.565094	0.604251	0.517144	0.519247	0.510268	0.542799	0.577934	0.636709	0.575269	0.541084	0.590204	0.546962	0.629854	0.650104	1.17635	1.20056	1.12474	1.06899	1.86807	1.15565	1.17183	1.32443	1.07336	1.27477	1.06543	1.15617	0.676925	0.426028	0.667982	0.587748
	R5	0.70353	0.780629	0.96147	0.229846	0.397151	0.527879	0.388249	0.487884	0.436586	0.494554	0.629112	0.698076	1.03716	0.863835	0.963586	1.04258	0.922616	0.400605	0.586925	0.61819	0.529301	0.515808	0.640644	0.641918	0.686964	0.609615	0.683132	0.566281	0.650179	0.706376	0.696267	0.680324	1.21016	1.144	1.24878	1.31809	1.51881	1.11015	1.15065	0.995809	1.021	1.08935	1.02062	1.22928	0.816325	0.634782	0.755975	0.680694
[truncated: 218 more columns]
