# Supplementary material for: The spatial frequency representation predicts category coding in the inferior temporal cortex
Source: eLife. 2025 Sep 12;13:RP93589. doi: 10.7554/eLife.93589 (PMC12431771; doi:10.7554/eLife.93589)
Supplement: Figure 3—source data 1. [file elife-93589-fig3-data1.xlsx]

## Sheet: Figure 3
a	LP	R1	-0.0338652	-0.0130153	-0.00417904	-0.0134601	0.0117941	0.00314062	-0.00264278	0.0163009	0.0355118	0.0870313	-0.000530172	-0.000333493	0.0906075	0.0800104	-0.00527713	-0.0576152	0.00422168	0.0826013	0.122345	0.0135307	0.0277204	-0.00773719	0.0492846	-0.0551794	0.409883	0.215066	0.108727	0.312163	0.170179	0.191832	0.0730323	0.0910914	0.00406667
		R2	-0.0527632	0.00827171	-0.0224659	-0.0288491	0.00896921	-0.00107943	0.000174098	-0.0092492	0.00736108	0.0980211	-0.0149542	-0.000824334	0.076628	0.0795685	-0.000157785	-0.0412936	0.0133934	0.0714339	0.0892581	-0.0307789	0.0113439	0.0073466	0.0228211	-0.065343	0.223304	0.154063	0.0857117	0.249031	0.144258	0.119425	0.0557876	0.0577895	0.0133673
		R3	-0.0519174	-0.01244	-0.00923199	-0.0222538	0.00049449	-0.0224811	0.0137463	-0.0115103	-0.00571905	0.0514456	-0.0226814	0.00417332	0.0529127	0.0755914	-0.022235	-0.039146	0.0153872	0.0362977	0.0686831	-0.0631078	0.0167213	-0.0344032	-0.0149841	-0.0637382	0.141676	0.0916248	0.0612577	0.196776	0.0664957	0.0665124	0.0235079	0.0237986	0.00406667
		R4	-0.0541984	-0.0463842	-0.0265564	-0.0184065	-0.00675064	-0.0185625	0.0111855	2.11836e-05	0.0133324	0.042451	-0.0350449	-0.00498904	0.0511652	0.0671953	-0.0123162	-0.0523881	0.0452949	0.0281265	0.0692392	-0.0371734	0.00792194	-0.0521805	-0.0359223	-0.0594588	0.146673	0.108132	0.0454345	0.193474	0.0397388	0.0704908	0.0100581	0.00450645	-0.00507077
		R5	-0.0544377	-0.0322605	-0.0573554	-0.038742	-0.0129238	-0.0203711	-0.025946	-0.0110581	-0.000885089	0.0362693	-0.024742	-0.019982	0.0436762	0.0451005	-0.0123162	-0.0576152	0.00741183	0.0289437	0.0556152	-0.0663407	0.00254457	-0.0473321	-0.0219635	-0.0749717	0.199982	0.0873187	0.0483114	0.172883	0.00963721	0.0215566	0.0100581	-0.00559896	-0.00507077
	HP	R1	-0.0592512	-0.0605223	-0.0105148	-0.00421795	-0.060738	0.009764	0.00891492	-0.117945	-0.0626386	-0.0747982	-0.0748978	-0.0637681	-0.037556	-0.0283733	-0.0662006	-0.0321644	-0.0697283	-0.041649	-0.00146067	-0.00572074	-0.00143369	0.0183342	0.0259673	-0.00466247	0.00515816	-0.00722977
		R2	-0.0592512	-0.0576818	-0.0135913	0.0259078	-0.0566812	0.00839854	0.00329603	-0.0945639	-0.0503273	-0.0988735	-0.0801003	-0.0774997	-0.0384725	-0.0352322	-0.0456829	-0.00186503	-0.0694443	-0.0271128	0.0108093	0.0792199	0.0438311	0.0736635	0.0514118	0.0353848	0.0377077	0.0100042
		R3	-0.0618148	-0.0499718	-0.00682314	0.0204634	-0.0505961	0.0100371	-0.0060688	-0.108812	-0.05159	-0.0670865	-0.0748978	-0.0631882	-0.00687734	-0.0263685	-0.0571552	0.0311397	-0.0472903	-0.0224238	0.0309321	0.0630407	0.0236636	0.126478	0.0288828	0.0043201	-0.0103701	-0.0144106
		R4	-0.0569724	-0.0394214	-0.0160524	0.0353448	-0.0306503	0.0250572	0.0644796	-0.105159	-0.0588505	-0.0552224	-0.0348994	-0.0249137	0.0353069	0.0196388	-0.0335488	0.0803761	-0.0370654	-0.00788759	0.0382941	0.0614228	0.0451756	0.173424	0.0792418	0.0413732	0.0323326	0.0114404
		R5	-0.0549785	-0.0317115	-0.00497729	0.0423124	-0.012733	0.0258764	0.0460621	-0.091824	-0.0519057	-0.0335702	-0.0346832	-0.036802	0.0153727	0.0221658	-0.0320044	0.0863278	-0.0347931	-0.00741868	0.0662697	0.10241	0.0492091	0.196059	0.0431954	0.0441803	0.00754711	0.00186594
	IU	R1	-0.00857862	-0.0182395	-0.0249129	0.0161742	0.00258759	-0.0175231	-0.00561025	0.00952043	-0.00208912	-0.0693357	-0.00985465	-0.0984481	-0.00526632
		R2	-0.0163464	-0.0108081	-0.0130014	0.00225153	0.000910372	0.0193486	0.0184879	0.015962	0.0420558	-0.0392624	-0.00757225	-0.0682996	0.00269017
		R3	-0.00983612	-0.0097621	-0.00489416	0.000419602	0.00510341	0.0170139	0.0167666	0.0208575	0.0579353	-0.0441311	0.00155736	-0.0657873	-0.00742402
		R4	-0.000504713	-0.00793167	-0.00174136	0.00408346	0.0101351	0.014951	-0.00492174	0.0108087	0.0439614	-0.0504322	0.00308576	-0.0566799	0.00228561
		R5	-0.0137423	-0.0147304	-0.00849737	-0.0226627	-0.0364077	-0.0107576	-0.00974136	-0.00619689	0.0360727	-0.0586722	-0.00985465	-0.0651592	-0.0171336
	U	R1	0.0263786	-0.00957163	0.00077954	-0.0213289	-0.0021504	-0.0143489	0.0219458	0.00350514	-0.163093	-0.0342909	-0.0957313	-0.109164	-0.0706565
		R2	0.0197227	-0.00717886	-0.124051	-0.0714006	-0.0142879	-0.0619287	-0.000532999	0.000285806	-0.185741	-0.0636353	-0.147488	-0.168014	-0.0907929
		R3	-0.0118901	-0.0354836	-0.120437	-0.0668124	-0.0118604	-0.0528886	-0.0297344	-0.0509919	-0.173998	-0.0854875	-0.151865	-0.164962	-0.0875053
		R4	0.0105111	-0.00992179	-0.0999553	-0.073196	0.00816651	-0.0248165	0.0141728	0.00261088	-0.171691	-0.0788278	-0.117614	-0.142512	-0.0759988
		R5	0.00957771	0.00354692	-0.113677	-0.0496563	-0.00518479	-0.00840143	0.0335003	-0.000787304	-0.169803	-0.0730005	-0.107719	-0.115703	-0.0735331
b		Face	0.333121	0.302635	0.341401	0.329161	0.342899	0.326837	0.330533	0.332875	0.322333	0.335622	0.352212	0.323902	0.330046	0.3176	0.336057	0.366513	0.33716	0.344822	0.372683	0.338024	0.346885	0.350554	0.359808	0.34049	0.335877	0.329525	0.305741	0.334608	0.347186	0.350367	0.277425	0.325289	0.366719	0.346016	0.339865	0.335476	0.334491	0.359539	0.321475	0.324994	0.273288	0.326451	0.336183	0.359269	0.31744	0.349041	0.292741
		Object	0.525698	0.555151	0.548126	0.574164	0.505214	0.595222	0.510225	0.561712	0.484101	0.572767	0.491532	0.535256	0.540756	0.557735	0.554058	0.557699	0.553617	0.581477	0.508308	0.545472	0.56229	0.527568	0.509059	0.580169	0.529007	0.537327	0.511464	0.568497	0.515586	0.527658	0.556435	0.518441	0.576889	0.53969	0.600518	0.54753	0.547017	0.614199	0.502769	0.507976	0.551707	0.539805	0.537329	0.463276	0.497583	0.527684	0.564566
		Face	0.90946	0.932888	0.951336	0.986892	0.908176	0.852134	0.864373	0.851269	0.942883	0.90145	0.899754	0.883951	0.836545	0.883346	0.899994	0.963247	0.890647	0.963418	0.819479	0.89285	0.882558	0.913405	0.843935	0.885811	1.01509	0.841066	0.776081	0.776075	0.947786	0.822138	0.897894	0.880165	0.891739	0.910279	1.02748	0.96966	0.845336	0.914973	0.835204	0.871744	0.882334	0.900481	1.01901	0.871651	0.857357	0.779248	0.935734
		Object	0.0998449	0.0763003	0.0791883	0.087721	0.0839328	0.065401	0.0592416	0.0691751	0.0743387	0.0817799	0.0809859	0.0967928	0.0602773	0.0762611	0.101705	0.0840912	0.0925224	0.0744288	0.0808998	0.0740521	0.0547799	0.0459576	0.0762384	0.0751358	0.0625767	0.0680505	0.0698487	0.110179	0.0616085	0.109393	0.068695	0.0469905	0.0597452	0.0641514	0.0717366	0.080776	0.0796885	0.0769468	0.0624431	0.0811768	0.0737859	0.047107	0.0712216	0.0806294	0.0609769	0.0884039	0.0738432
		Face	0.0727606	0.0686811	0.079301	0.0773329	0.0485347	0.0666006	0.0546163	0.072977	0.0742153	0.0692565	0.0991526	0.0735862	0.0619693	0.0564404	0.0921827	0.0484782	0.0734922	0.0736461	0.0749057	0.0722891	0.0698999	0.0627214	0.0817085	0.0822529	0.0562432	0.0661943	0.0809393	0.0694369	0.0726696	0.0856334	0.0791008	0.0954644	0.0561507	0.0831977	0.0792213	0.0575883	0.0757049	0.0591793	0.051614	0.0669271	0.0696609	0.0869626	0.0880603	0.0980977	0.0822715	0.0844625	0.0695002
		Object	0.139011	0.129911	0.119678	0.210174	0.17557	0.132113	0.155475	0.119337	0.185384	0.153822	0.184269	0.185848	0.175184	0.151483	0.157308	0.193482	0.096505	0.132337	0.174648	0.183538	0.117246	0.152582	0.153024	0.14884	0.127386	0.132026	0.176977	0.134313	0.135786	0.117791	0.128269	0.159248	0.150758	0.183274	0.142468	0.114847	0.192879	0.162519	0.132589	0.160192	0.132641	0.177514	0.142892	0.101824	0.164454	0.171627	0.125174
		Face	0.0660172	0.0661121	0.007861	0.0404925	0.0258697	0.0395159	0.0677799	0.0213293	0.0352878	0.0689893	0.0555231	0.0413347	0.0639132	0.0292136	0.0284117	0.0576564	0.0371883	0.0530441	0.0560014	0.0696372	0.0265119	0.0570667	0.0296721	0.0722741	0.0783136	0.0201672	0.039907	0.0310887	0.0470408	0.0503287	0.0313225	0.0518857	0.0578273	0.0406364	0.0438167	0.0248877	0.0759786	0.0446622	0.0341375	0.0471888	0.0272542	0.0441367	0.0490611	0.0380653	0.059135	0.00661193	0.0771541
		Object	0.0398411	0.0228698	0.021785	0.0162605	-0.00187641	0.0358252	0.0105685	0.0613364	0.0172255	0.0418995	0.00200205	0.0284417	0.00492598	0.0292562	0.0342109	0.0472259	0.0321286	-0.000649854	0.0222443	0.0307312	0.044597	0.0204371	-0.0130444	-0.0145983	-0.00236678	0.0352249	0.0134546	0.0348161	0.00386002	0.00929717	0.0245057	0.0234935	0.00401723	0.024124	0.0147443	0.0125814	0.0181404	-0.00344631	0.0103027	0.00594599	0.0308369	0.0256081	0.00546131	0.033021	0.036018	0.0292808	0.010823
		Face	0.156707	0.213542	0.2428	0.164605	0.218071	0.159937	0.149325	0.192104	0.221343	0.168675	0.188217	0.19498	0.135214	0.223241	0.180448	0.197481	0.210359	0.223502	0.193064	0.192004	0.151574	0.199361	0.163855	0.189429	0.16992	0.184666	0.221713	0.148824	0.22434	0.179619	0.162718	0.243742	0.190488	0.194709	0.200587	0.204227	0.216272	0.168376	0.233899	0.158748	0.185167	0.253868	0.141365	0.253888	0.201833	0.154152	0.210981
		Object	0.073889	0.089635	0.109228	0.107091	0.0811491	0.0802535	0.108861	0.0899129	0.0568293	0.079972	0.0535382	0.0942258	0.115555	0.0844398	0.094904	0.068666	0.0990597	0.0774169	0.0843862	0.103962	0.089867	0.105366	0.099532	0.103133	0.0691527	0.107437	0.08148	0.0728601	0.110752	0.0503883	0.0596456	0.091898	0.0773702	0.074475	0.115095	0.112595	0.091184	0.0876992	0.0515271	0.0792867	0.114084	0.0573757	0.070457	0.080649	0.077395	0.0779733	0.0626642
c		SF	0.1872	0.1792	0.2072	0.1904	0.2004	0.192	0.2036	0.2032	0.1888	0.2284	0.228	0.2108	0.2372	0.2216	0.2368	0.2312	0.2252	0.2372	0.2504	0.2448	0.246	0.2292	0.264	0.2372	0.2336	0.2304	0.2448	0.2368	0.2476	0.2224	0.224	0.2232	0.2204	0.204	0.2136	0.212	0.2216	0.2176	0.2148	0.222	0.2272	0.208	0.246	0.2324	0.23	0.238	0.2172
		Category	0.55	0.5575	0.485	0.5275	0.5675	0.61	0.6075	0.58	0.6175	0.5675	0.59	0.58	0.555	0.6475	0.635	0.6225	0.64	0.6325	0.575	0.6925	0.6625	0.6525	0.67	0.61	0.6375	0.5825	0.625	0.5825	0.6025	0.665	0.6725	0.5925	0.655	0.6075	0.615	0.6125	0.6175	0.6125	0.6525	0.605	0.645	0.6225	0.6125	0.6275	0.6075	0.5475	0.5225
d		SF	0.2928	0.2584	0.2496	0.2488	0.2752	0.2812	0.2828	0.2836	0.26	0.274	0.2884	0.2556	0.2924	0.2664	0.2736	0.2828	0.2928	0.3028	0.3016	0.312	0.2984	0.3064	0.3476	0.3704	0.3572	0.3512	0.3492	0.366	0.3824	0.3784	0.3724	0.3936	0.3988	0.3736	0.374	0.3656	0.3928	0.386	0.3964	0.3776	0.3572	0.3548	0.3352	0.2976	0.2984	0.2964	0.2944
		Category	0.33	0.3425	0.3675	0.325	0.345	0.3475	0.3325	0.3225	0.355	0.3375	0.3625	0.38	0.335	0.3275	0.37	0.365	0.3575	0.365	0.3425	0.3625	0.3225	0.3775	0.335	0.37	0.3375	0.415	0.3525	0.3375	0.3825	0.375	0.4	0.3925	0.3725	0.4025	0.4125	0.43	0.4475	0.455	0.4375	0.4325	0.45	0.4525	0.4175	0.455	0.425	0.4425	0.4925
[truncated: 188 more columns]
