# Supplementary material for: The spatial frequency representation predicts category coding in the inferior temporal cortex
Source: eLife. 2025 Sep 12;13:RP93589. doi: 10.7554/eLife.93589 (PMC12431771; doi:10.7554/eLife.93589)
Supplement: Figure 4—source data 1. [file elife-93589-fig4-data1.xlsx]

## Sheet: Figure 4
a	SF	0.247	0.251	0.335	0.299	0.233	0.26	0.285	0.296	0.239	0.252	0.213	0.241	0.253	0.273	0.264	0.284	0.276	0.261	0.289	0.27	0.234	0.27	0.268	0.264	0.275	0.262	0.272	0.241	0.292	0.239	0.243	0.261	0.268	0.293	0.266	0.258	0.273	0.26	0.305	0.274	0.28	0.274	0.28	0.282	0.247	0.32	0.256	0.293
	Category	0.56875	0.50625	0.53125	0.50625	0.5	0.5875	0.79375	0.61875	0.45	0.48125	0.53125	0.53125	0.65	0.525	0.71875	0.55	0.55	0.7	0.55625	0.5	0.51875	0.475	0.6875	0.59375	0.675	0.81875	0.66875	0.51875	0.55625	0.525	0.49375	0.48125	0.49375	0.4375	0.5125	0.55625	0.49375	0.4125	0.41875	0.79375	0.79375	0.9	0.8375	0.76875	0.7	0.46875	0.7	0.6625
b	SF	-0.354777	14.5339	16.1318	-7.31141	1.89353	8.24675	-6.63504	-15.8042	-2.50752	-11.3303	3.51015	-3.7331	2.45095	5.034	1.07579	7.64567	-0.519265	0.821939	-1.6179	7.60557	-58.1406	5.69162	-3.0649	2.31415	12.1375	-6.19197	-0.841445	0.264116	9.70029	4.3692	-16.8287	-28.3478	1.50381	1.68961	2.90518	-4.47858	-22.0675	-0.540573	-4.41388	-13.1657	18.0592	6.51687	7.03337	-10.6799	-1.18802	-20.3992	-9.73988	-0.546193
	Category	-1.10914	3.01575	1.28741	1.81906	-0.553163	-2.48015	4.03595	5.37342	0.693387	-2.27327	-0.548861	2.63801	-2.38188	0.314707	-0.926899	-1.00261	-6.4892	1.7242	1.7704	0.787095	-2.37834	-0.908781	2.5996	1.123	0.0740218	7.29642	1.15936	0.73594	1.36604	1.09703	0.0874925	-4.17059	-3.68503	-0.860497	-2.44345	0.333794	-4.02407	0.0250741	0.548273	-4.0878	-3.01089	-8.01483	-8.24354	3.22676	0.255516	2.51882	4.69564	2.75508
[truncated: 206 more columns]
