# Supplementary material for: The spatial frequency representation predicts category coding in the inferior temporal cortex
Source: eLife. 2025 Sep 12;13:RP93589. doi: 10.7554/eLife.93589 (PMC12431771; doi:10.7554/eLife.93589)
Supplement: Figure 5—source data 1. [file elife-93589-fig5-data1.xlsx]

## Sheet: Figure 5
a	Data Histogram SF	0.00587219	0.00517777	0.00552486	0.00517777	0.00483092	0.00310024	-0.000343289	0.00413793	0.00275482	0.00865951	0.00796123	0.0044843	0.00587219	-0.000686342	-0.000686342	0.00552486	0.0114623	0.00691563	0.00691563	-0.0020562	0.0037918	0.00552486	0.000687285	0.00137552	0.00103128	0.0034459	0.0037918	0.0128696	-0.00239808	0.00310024	-0.00102916	0.00587219	0.00552486	0.00656758	0.00587219	0.00240964	0.0044843	0.0160502	0.00726392	0.00621977	0.00726392	0.0264364	0.0156958	0.00761246	0.0044843	0.0107602	0.0118138	0.00552486
	Data Histogram Category	-0.00847201	-0.0051609	-0.00364853	0.00106919	0.00536892	0.0115759	0.00244723	-0.00561372	0.00106919	0.0111077	-0.00228345	-0.00152346	-0.000457526	-0.00137132	0.00955022	0.00352167	0.000610687	-0.00121914	0.0112637	0.00614062	0.00260058	-0.00651811	-0.00470767	-0.00213155	-0.016359	-0.00152346	0.00799754	0.00552317	-0.000305064	0.00506057	0.00444444	0.00275398	-0.0069697	0.00244723	0.00229393	0.00768758	0.00737781	0.00352167	0.00198746	-0.00379997	0.00336803	0.00336803	0.0111077	-0.00106691	-0.00106691	-0.00576456	0.00382907	0.00536892
b	SF histogram	0	0	0	0	0	0	0	1	0	0	0	1	1	0	2	1	1	1	2	1	7	5	6	13	28	18	43	44	73	105	111	175	214	283	382	471	596	716	995	1130	1330	1464	1654	1863	1966	2315	2534	2038
	Category Histogram	2	6	3	7	3	7	3	11	8	12	20	16	18	21	20	24	34	37	39	45	68	83	84	102	144	160	207	261	300	375	491	551	684	818	902	1042	1162	1326	1460	1618	1735	1860	2156	2121	1732	1577	1343	1226
c	SF	-0.00107571	0.000360652	0.00071221	-5.5174e-05	0.000412565	0.00103042	0.00106859	0.000100027	-0.00123385	-0.00127606	-0.000915967	-0.000826011	-0.000981321	-0.000893965	-0.000853739	-0.00124179	-0.00115343	-0.00102238	-0.000286286	-0.000889958	-0.000898377	-0.00106538	-0.000481591	0.000710646	0.00492073	0.00618969	0.00942113	0.00831881	0.00763529	0.00419788	0.00233338	0.00146742	0.00221815	0.00335772	0.00681419	0.00900672	0.0122123	0.0163675	0.0149531	0.00918826	0.00119709	-0.00173623	-0.00235795	-0.00253003	-0.00274227	-0.0027242	-0.00182098	-7.34994e-05
	Category	-0.00134487	-0.00115488	-0.00125248	-0.000915529	-0.000882603	-0.000928777	-0.00121437	-0.00112162	-0.000259845	-0.000301549	-0.000486578	-0.000643098	-0.000143979	0.000451229	0.000517783	0.000550827	0.000848487	0.00025956	0.000863413	0.000862013	0.00174826	0.000858186	0.000395805	-0.000433683	-0.00069614	-0.00112592	-0.00137631	6.64626e-05	0.00247682	0.00535751	0.00820781	0.0095493	0.0159183	0.0242805	0.0337076	0.0383965	0.037193	0.0311232	0.0277238	0.023308	0.017942	0.00785372	0.00113098	-0.00054424	-0.000501582	-0.000809004	-0.000912908	-0.00144418
[truncated: 206 more columns]
