# Supplementary material for: The spatial frequency representation predicts category coding in the inferior temporal cortex
Source: eLife. 2025 Sep 12;13:RP93589. doi: 10.7554/eLife.93589 (PMC12431771; doi:10.7554/eLife.93589)
Supplement: Figure 6—source data 1. [file elife-93589-fig6-data1.xlsx]

## Sheet: Figure 6
a		CORnet-RT_IT_output_feats.mat'	0.28877	0.304813	0.296791	0.315508	0.342246	0.379679	0.336898	0.350267	0.334225	0.339572	0.34492	0.342246	0.323529	0.336898	0.331551	0.302139	0.334225	0.315508	0.31016	0.328877	0.31016	0.318182	0.307487	0.323529	0.320856	0.323529	0.299465	0.272727	0.307487	0.302139	0.331551	0.291444	0.323529	0.331551	0.296791	0.360963	0.307487	0.307487	0.286096	0.302139	0.355615	0.315508	0.323529	0.315508	0.312834	0.291444	0.331551
		CORnet-RT_IT_output_feats_random.mat'	0.374332	0.350267	0.320856	0.358289	0.336898	0.355615	0.326203	0.36631	0.328877	0.296791	0.320856	0.28877	0.342246	0.347594	0.347594	0.355615	0.358289	0.382353	0.342246	0.334225	0.318182	0.320856	0.331551	0.390374	0.318182	0.352941	0.315508	0.355615	0.304813	0.355615	0.347594	0.320856	0.328877	0.352941	0.350267	0.307487	0.304813	0.352941	0.360963	0.336898	0.342246	0.331551	0.318182	0.347594	0.326203	0.318182	0.347594
		CORnet-S_IT_output_feats.mat'	0.756684	0.778075	0.775401	0.719251	0.78877	0.748663	0.796791	0.778075	0.754011	0.852941	0.818182	0.756684	0.772727	0.772727	0.740642	0.719251	0.823529	0.748663	0.783422	0.772727	0.802139	0.780749	0.78877	0.81016	0.786096	0.727273	0.735294	0.815508	0.794118	0.764706	0.799465	0.778075	0.775401	0.772727	0.743316	0.751337	0.818182	0.740642	0.76738	0.772727	0.76738	0.772727	0.76738	0.727273	0.772727	0.748663	0.764706
		CORnet-S_IT_output_feats_random.mat'	0.374332	0.427807	0.382353	0.393048	0.377005	0.374332	0.36631	0.395722	0.326203	0.390374	0.342246	0.390374	0.393048	0.331551	0.331551	0.411765	0.358289	0.355615	0.34492	0.377005	0.451872	0.350267	0.352941	0.387701	0.395722	0.350267	0.425134	0.360963	0.371658	0.387701	0.385027	0.31016	0.390374	0.371658	0.403743	0.331551	0.347594	0.320856	0.377005	0.355615	0.390374	0.379679	0.326203	0.34492	0.409091	0.352941	0.379679
		CORnet-Z_IT_output_feats.mat'	0.954545	0.92246	0.94385	0.938503	0.967914	0.919786	0.967914	0.981283	0.954545	0.965241	0.893048	0.951872	0.935829	0.911765	0.959893	0.938503	0.970588	0.957219	0.951872	0.962567	0.975936	0.941176	0.917112	0.941176	0.954545	0.90107	0.951872	0.927807	0.951872	0.959893	0.903743	0.941176	0.97861	0.957219	0.946524	0.957219	0.917112	0.935829	0.94385	0.949198	0.909091	0.957219	0.949198	0.951872	0.941176	0.94385	0.949198
		CORnet-Z_IT_output_feats_random.mat'	0.959893	0.941176	0.970588	0.973262	0.941176	0.957219	0.970588	0.975936	0.973262	0.954545	0.97861	0.970588	0.957219	0.983957	0.973262	0.957219	0.959893	0.941176	0.967914	0.981283	0.981283	0.975936	0.983957	0.986631	0.970588	0.957219	0.951872	0.959893	0.962567	0.981283	0.97861	0.967914	0.967914	0.962567	0.97861	0.986631	0.970588	0.973262	0.986631	0.975936	0.986631	0.949198	0.981283	0.986631	0.967914	0.97861	0.986631
		efficient_pre.mat'	0.941176	0.954545	0.92246	0.94385	0.94385	0.949198	0.959893	0.933155	0.949198	0.949198	0.927807	0.951872	0.949198	0.951872	0.957219	0.954545	0.938503	0.941176	0.957219	0.930481	0.930481	0.94385	0.946524	0.941176	0.94385	0.965241	0.954545	0.935829	0.962567	0.941176	0.930481	0.959893	0.941176	0.954545	0.954545	0.970588	0.946524	0.94385	0.962567	0.94385	0.946524	0.94385	0.94385	0.941176	0.935829	0.938503	0.94385
		efficient_random.mat'	0.307487	0.307487	0.358289	0.296791	0.315508	0.320856	0.275401	0.286096	0.342246	0.342246	0.299465	0.326203	0.312834	0.331551	0.336898	0.28877	0.280749	0.320856	0.283422	0.256684	0.283422	0.296791	0.347594	0.350267	0.318182	0.280749	0.278075	0.294118	0.294118	0.283422	0.272727	0.315508	0.270053	0.318182	0.318182	0.296791	0.336898	0.334225	0.302139	0.272727	0.275401	0.28877	0.259358	0.328877	0.262032	0.350267	0.28877
		inception_pre.mat'	0.895722	0.90107	0.879679	0.895722	0.906417	0.92246	0.871658	0.895722	0.898396	0.919786	0.877005	0.877005	0.868984	0.895722	0.909091	0.893048	0.893048	0.885027	0.898396	0.868984	0.879679	0.887701	0.911765	0.855615	0.863636	0.887701	0.895722	0.914439	0.877005	0.895722	0.882353	0.879679	0.903743	0.879679	0.882353	0.898396	0.86631	0.879679	0.874332	0.911765	0.914439	0.917112	0.895722	0.885027	0.895722	0.893048	0.887701
		inception_random.mat'	0.681818	0.700535	0.628342	0.700535	0.660428	0.647059	0.687166	0.724599	0.657754	0.668449	0.684492	0.647059	0.681818	0.631016	0.657754	0.700535	0.705882	0.574866	0.673797	0.649733	0.676471	0.703209	0.697861	0.673797	0.660428	0.697861	0.700535	0.665775	0.719251	0.644385	0.631016	0.695187	0.71123	0.625668	0.708556	0.705882	0.628342	0.676471	0.695187	0.679144	0.737968	0.639037	0.639037	0.636364	0.647059	0.585561	0.647059
		resnet18_pre.mat'	0.975936	0.941176	0.965241	0.962567	0.962567	0.949198	0.981283	0.949198	0.983957	0.975936	0.954545	0.970588	0.967914	0.965241	0.949198	0.973262	0.962567	0.965241	0.962567	0.951872	0.981283	0.981283	0.949198	0.97861	0.962567	0.986631	0.97861	0.951872	0.94385	0.97861	0.973262	0.967914	0.959893	0.983957	0.97861	0.986631	0.951872	0.965241	0.973262	0.967914	0.967914	0.989305	0.989305	0.949198	0.957219	0.97861	0.975936
		resnet18_random.mat'	0.962567	0.941176	0.949198	0.959893	0.94385	0.938503	0.957219	0.962567	0.935829	0.941176	0.957219	0.935829	0.935829	0.954545	0.951872	0.946524	0.927807	0.959893	0.94385	0.949198	0.954545	0.959893	0.938503	0.957219	0.946524	0.959893	0.957219	0.935829	0.949198	0.925134	0.954545	0.949198	0.949198	0.938503	0.946524	0.949198	0.941176	0.941176	0.967914	0.954545	0.938503	0.946524	0.935829	0.951872	0.949198	0.930481	0.941176
		resnet34_pre.mat'	0.938503	0.954545	0.946524	0.959893	0.949198	0.957219	0.967914	0.967914	0.970588	0.962567	0.959893	0.927807	0.949198	0.951872	0.967914	0.930481	0.925134	0.957219	0.957219	0.94385	0.954545	0.935829	0.946524	0.946524	0.965241	0.959893	0.951872	0.957219	0.97861	0.975936	0.967914	0.954545	0.949198	0.951872	0.94385	0.959893	0.957219	0.975936	0.962567	0.962567	0.962567	0.94385	0.957219	0.957219	0.951872	0.954545	0.938503
		resnet34_random.mat'	0.863636	0.86631	0.874332	0.879679	0.877005	0.879679	0.855615	0.871658	0.858289	0.868984	0.860963	0.86631	0.815508	0.834225	0.84492	0.860963	0.855615	0.86631	0.887701	0.871658	0.850267	0.828877	0.842246	0.86631	0.855615	0.879679	0.877005	0.86631	0.855615	0.84492	0.874332	0.860963	0.863636	0.898396	0.860963	0.874332	0.868984	0.852941	0.879679	0.855615	0.834225	0.877005	0.86631	0.871658	0.877005	0.887701	0.86631
		vgg11_pre.mat'	0.946524	0.957219	0.957219	0.954545	0.938503	0.959893	0.927807	0.946524	0.951872	0.927807	0.970588	0.925134	0.941176	0.951872	0.930481	0.946524	0.973262	0.949198	0.94385	0.949198	0.938503	0.933155	0.967914	0.973262	0.962567	0.925134	0.959893	0.949198	0.951872	0.927807	0.967914	0.951872	0.938503	0.92246	0.927807	0.959893	0.959893	0.975936	0.957219	0.951872	0.970588	0.94385	0.94385	0.94385	0.965241	0.938503	0.946524
		vgg11_random.mat'	0.951872	0.941176	0.917112	0.92246	0.930481	0.951872	0.925134	0.935829	0.906417	0.959893	0.94385	0.898396	0.946524	0.954545	0.933155	0.933155	0.930481	0.94385	0.917112	0.925134	0.941176	0.917112	0.933155	0.933155	0.925134	0.938503	0.94385	0.962567	0.949198	0.938503	0.930481	0.954545	0.965241	0.94385	0.917112	0.930481	0.919786	0.94385	0.930481	0.930481	0.941176	0.949198	0.957219	0.933155	0.951872	0.933155	0.927807
		vgg16_pre.mat'	0.914439	0.94385	0.917112	0.949198	0.919786	0.92246	0.930481	0.94385	0.911765	0.954545	0.951872	0.946524	0.917112	0.94385	0.893048	0.917112	0.935829	0.954545	0.941176	0.94385	0.927807	0.909091	0.909091	0.925134	0.919786	0.909091	0.938503	0.959893	0.92246	0.903743	0.930481	0.92246	0.917112	0.925134	0.933155	0.879679	0.917112	0.893048	0.959893	0.919786	0.935829	0.917112	0.935829	0.911765	0.933155	0.935829	0.890374
		vgg16_random.mat'	0.90107	0.882353	0.927807	0.911765	0.90107	0.893048	0.927807	0.917112	0.898396	0.895722	0.906417	0.895722	0.909091	0.887701	0.917112	0.893048	0.925134	0.885027	0.917112	0.885027	0.938503	0.906417	0.925134	0.933155	0.903743	0.898396	0.917112	0.906417	0.911765	0.914439	0.887701	0.938503	0.917112	0.933155	0.930481	0.906417	0.898396	0.909091	0.898396	0.882353	0.911765	0.911765	0.898396	0.911765	0.877005	0.917112	0.925134
b	Corenet	R1	1	0.974359	0.971831	0.97561	0.909091	0.973684	0.972222	1	0.973333	0.938462	1	1	0.987654	0.987342	0.986842	0.961039	0.970588	0.917808	1	1	1	1	0.973333	0.958333	0.985075	0.985915	0.91358	0.923077	1	1	1	1	0.975309	0.987013	0.973333	1	1	1	0.985714	1	0.986301	0.987654	0.987952	1	1	1	0.986842
		R2	0.934211	0.921053	0.986667	0.958333	0.972603	0.96	0.925	0.959459	0.942857	0.925	0.942029	0.973684	0.958333	0.974359	1	0.959459	0.986111	0.935897	0.945946	0.973684	1	0.984127	1	0.97561	0.959459	0.924051	0.944444	0.914286	0.949367	0.975309	0.986842	0.959459	0.973684	0.942029	1	0.972973	0.973333	0.957143	0.986486	0.945205	0.9875	0.971014	0.958333	1	0.95	0.956522	1
		R3	0.973333	0.946667	0.974359	1	0.972973	0.945205	1	0.986486	1	0.987179	1	0.946667	0.961039	0.969231	0.96	0.974026	0.947368	0.945946	0.972603	0.970588	0.972603	0.973684	1	1	0.987342	0.974359	0.985507	0.987342	0.986667	1	0.974026	0.986301	0.986842	0.975	0.957143	1	0.987013	0.974026	0.975	0.986111	0.972222	0.973333	1	0.985915	0.973333	0.973684	0.961039
		R4	0.961538	0.9125	0.9375	0.971014	0.881579	0.942857	0.973333	0.973333	0.975	0.95	0.975	0.955882	0.882353	0.986842	0.946667	0.944444	0.914634	0.972222	0.947368	0.969697	0.955882	0.9375	0.947368	1	0.935897	0.950617	0.925926	0.986842	0.881579	0.938272	0.958904	0.9375	0.946667	0.902778	0.972603	0.972973	0.924051	0.958904	1	0.973333	1	0.90411	0.974026	0.972603	0.913043	0.959459	1
		R5	0.934211	0.953846	0.985714	0.961538	0.972973	0.9625	0.985294	0.958333	0.973333	0.971831	0.971014	0.971014	0.986842	1	0.975904	0.945946	0.986842	0.935065	0.972222	0.988095	0.974026	0.9875	1	1	0.986842	0.953846	1	0.985915	1	1	0.975309	0.960526	0.954545	1	0.987654	0.986667	0.970149	0.974026	0.985915	0.974359	0.986301	0.907895	0.985915	0.973333	1	1	0.986667
	ResNet	R1	0.9625	0.894737	0.915493	0.942029	0.913043	0.971831	0.858974	0.910256	0.958333	0.938272	0.915493	0.942857	0.883117	0.880597	0.911392	0.948052	0.934211	0.8875	0.960526	0.961538	0.959459	0.849315	0.958333	0.927536	0.947368	0.961039	0.848101	0.896104	0.934211	0.961538	0.972603	0.952381	0.974684	0.971014	0.971429	0.934211	0.847222	0.929577	0.949367	0.972603	0.829268	0.969231	0.961538	0.955882	0.986486	0.971429	0.942029
		R2	0.918919	0.934211	0.964706	0.949367	0.92	0.936709	0.945205	0.943662	0.922078	0.910256	0.961039	0.933333	0.824324	0.923077	0.971429	0.88	0.960526	0.948718	0.959459	0.987013	0.925373	0.925373	0.917808	0.9625	0.878378	0.975	0.959459	0.910256	0.957746	0.866667	0.958333	0.921875	0.916667	0.986486	0.985294	0.933333	0.936709	0.902439	0.941176	0.9375	0.946667	0.987179	0.894118	0.958333	0.911392	0.973333	0.947368
		R3	0.922078	0.9375	0.882353	0.945205	0.91358	0.960526	0.972973	0.986842	0.959459	0.907895	0.888889	0.935897	0.944444	0.875	0.925	0.933333	0.948052	0.911392	0.921053	0.943662	0.959459	0.925926	0.873418	0.932432	0.894737	0.914286	0.973684	0.914286	0.909091	0.932432	0.963855	0.960526	0.947368	0.939024	0.8875	0.921053	0.957143	0.945946	0.948718	0.929577	0.884615	0.95	0.92	0.910256	0.971831	0.906977	0.921053
		R4	0.692308	0.802817	0.763158	0.769231	0.859155	0.766234	0.631579	0.692308	0.684932	0.811594	0.777778	0.72973	0.736111	0.717949	0.581081	0.75	0.647887	0.73913	0.74026	0.680556	0.653333	0.607595	0.607595	0.746988	0.777778	0.72973	0.818182	0.887097	0.821918	0.6875	0.652778	0.693333	0.720588	0.807692	0.679012	0.780822	0.789474	0.686567	0.767123	0.671053	0.80597	0.74026	0.765625	0.730769	0.706667	0.851351	0.776316
		R5	0.794872	0.746479	0.837838	0.8	0.782051	0.760563	0.876712	0.830986	0.769231	0.757143	0.753425	0.792208	0.696203	0.774648	0.830986	0.786667	0.77027	0.823529	0.859155	0.776316	0.77381	0.851351	0.873239	0.764706	0.776316	0.808219	0.779412	0.747126	0.662338	0.776119	0.810811	0.773333	0.746835	0.788732	0.813333	0.797297	0.818182	0.7875	0.789474	0.77027	0.694444	0.743243	0.763889	0.820513	0.813333	0.724638	0.753247
c (left)	LP	R1	0.333908	0.0743452	0.635118	0.231295	0.00464216	0.106045	0.0114579	0.084315	0.0870878	0.139175	0.00464216	0.114888	0.274215	0.114353	0.0129572	0.00788768	0.145199	0.202874	0.00507061	0.0305965	0.148516	0.442675	0.246809	0.705619	0.175489	0.118673	0.19634	0.00388567	0.0428972	0.758816	0.0249831	0.0747043	0.0379349	0.23408	0.00971573	0.220479	0.50597	0.0262975	0.0402262	0.0727226	0.0308998	0.207631	0.166718	0.084315	0.239318	0.231341	0.303043
		R2	0.131863	0.0526098	0.587861	0.243884	0.00919424	0.192882	0.0180179	0.18898	0.0725781	0.148994	0.00919424	0.13218	0.206967	0.160878	0.00331617	0.000330359	0.128442	0.216513	0.00542743	0.0205631	0.236673	0.424298	0.184895	0.661256	0.0863052	0.0355152	0.246065	0.00102789	0.0163173	0.681102	0.0593241	0.0682592	0.03164	0.229362	0.00708203	0.218542	0.41014	0.0213765	0.0265966	0.0237809	0.0424678	0.227469	0.160175	0.18898	0.197692	0.197666	0.272006
		R3	0.0611513	0.0394743	0.55207	0.0720419	0.000195182	0.0986444	0.00643774	0.0888366	0.0344583	0.0818668	0.000195182	0.136893	0.126804	0.131607	0.0028143	0.00280872	0.0828605	0.0793615	0.00504907	0.0111333	0.162758	0.432283	0.0933796	0.628022	0.0242299	0.0790578	0.11909	0.000985099	0.0118105	0.58649	0.0185284	0.060653	0.0186934	0.217901	0.000214013	0.121847	0.340725	0.00772566	0.00811886	0.0609203	0.0110232	0.110758	0.169654	0.0888366	0.101735	0.0722356	0.246896
		R4	0.0209871	0.0143403	0.519784	0.0524743	0.00026957	0.0316122	0.00387481	0.0252943	0.0627956	0.109682	0.00026957	0.0360909	0.037525	0.0474581	0.00119718	0.000241551	0.0578142	0.0488719	0.00216501	0.0104538	0.0598915	0.381848	0.0774858	0.556964	0	0.0323777	0.0657485	0.00203522	0.0113806	0.512009	0.00689425	0.0397457	0.00068511	0.187492	0.00230489	0.0283385	0.296182	0.00179065	0.000540503	0.0401826	0.00441878	0.0297336	0.0859147	0.0252943	0.0532781	0.0170211	0.200853
		R5	0.0393597	0.0259705	0.482225	0.0861325	0.000876315	0.00465197	0.00510225	0.00188062	0.0329768	0.0727066	0.000876315	0.0519024	0.0101279	0.0560864	0	0	0.0497237	0.115661	0	0.00174928	0.121331	0.396476	0.0343625	0.473076	0.00626415	0.0460405	0.103168	0	0.00137264	0.431161	0.00552889	0.0334691	0.000984941	0.186917	0.000617182	0.0055981	0.288019	0.00552443	0.000956248	0.0251766	0.00286312	0.00534739	0.0808812	0.00188062	0.107585	0.0141945	0.175335
	HP	R1	0.00309266	0.0124551	0	0.00913882	0.00596065	0	0	0	0.0144346	0.000316586	0.0114685	0.00199337	0.112365	0	0.00935912	0.059689	0.0706686	0.00155941	0.0649873	0.170446	0.00296875	0.0105653	0.0013136	0.0046628	0.00118523	0.0486212	7.60365e-05	0.0393032	0.00287417	0.134017	0.00307853	0.0017912	0.0140224	0.0395101	0.05221	0.10254	0	0.0426506	0.000663603	0.00371765	0.0166453	0.0467557	0.0276051	0.00419851	0.0426506	0.208056	0.00419851
		R2	0.130061	0.0898071	0.00857841	0.0443828	0.0325565	0.0589658	0.0333702	0.0150359	0.0710195	0.0577012	0.00399314	0.0107426	0.110389	0.0150359	0.0894205	0.132178	0.0771732	0.0389096	0.0724768	0.137016	0.0223716	0.0429714	0.00602767	0.0434846	0.124237	0.116119	0.0227936	0.00447755	0.0656968	0.209609	0.00620896	0.0601388	0.0418553	0.0875912	0.140278	0.224602	0.0734429	0.0342042	0.0404547	0.067954	0.00417536	0.0309772	0.264332	0.0281559	0.0342042	0.185551	0.0281559
		R3	0.122046	0.128406	0.00919914	0.0605474	0.0418429	0.140315	0.0152452	0.00755477	0.109146	0.14338	0.00352658	0.00939554	0.166504	0.00755477	0.0965706	0.182496	0.138233	0.0283137	0.220221	0.23075	0.0866015	0.0308169	0.044876	0.0385029	0.120388	0.141981	0.0788075	0.0645025	0.0369734	0.179044	0.0285104	0.0593449	0.0281204	0.117155	0.218939	0.1729	0.176147	0.0433756	0.0219231	0.0262319	0.00521785	0.0372836	0.374116	0.0225165	0.0433756	0.226777	0.0225165
		R4	0.256574	0.119835	0.0351438	0.137306	0.0509479	0.151907	0.010145	0.0151786	0.159392	0.151098	0.046999	0.0852769	0.20271	0.0151786	0.247776	0.194867	0.397683	0.0361007	0.473464	0.42701	0.183575	0.0884655	0.222264	0.0550219	0.160672	0.28686	0.111426	0.269036	0.0306677	0.225532	0.0730891	0.0637069	0.0440437	0.077443	0.22456	0.141655	0.206673	0.10712	0.0819675	0.0300297	0.0602731	0.0753551	0.577345	0.0553127	0.10712	0.310143	0.0553127
		R5	0.27982	0.143338	0.0312649	0.113304	0.0447301	0.148781	0.0376821	0.0217527	0.150125	0.136196	0.070731	0.215073	0.209816	0.0217527	0.30307	0.215498	0.290092	0.0698928	0.387623	0.286297	0.103878	0.0641583	0.150549	0.0825154	0.23376	0.322621	0.0902484	0.195593	0.0868836	0.206899	0.0482316	0.0901466	0.125929	0.138722	0.231726	0.265754	0.181823	0.195584	0.115291	0.0881681	0.0767314	0.0758658	0.509145	0.0571807	0.195584	0.358108	0.0571807
	IU	R1	0.0901533	0	0	0.0817635	0.0995508	0.0679251	0.000388742	0.138845	0.110985	0.00869628	0	0.148014	0.0447229	0.0332109	0.0205649	0.0367619	0.0223141	0.13537	0	0	0.0343784	0	0.0820336	0.000712385	0.118545	0	0.0540546	0.000526125	0.113799	0	0.0323955	0.0249604	0.121908	0.0529997	0	0.661696	0.039281	5.23273e-05	0	0.00305033	0	0.353832	0.0311034	0	0.0118168	0.0145712	0
		R2	0.181672	0.0168086	0.0102919	0.169127	0.16658	0.0715478	0.0787019	0.225488	0.242967	0.0840811	0.00188212	0.323241	0.244834	0.0240569	0.0861534	0.130105	0.183684	0.272449	0.00456119	0.00438727	0.0502134	0	0.161765	0.00136162	0.150017	0.00087013	0.147445	0.0328572	0.101304	0.00792873	0.120942	0.0218362	0.220774	0.0661305	0.013673	0.626325	0.0719061	0.00544883	0.00551156	0.00357581	0.0188478	0.330094	0.0608094	0.0170623	0.12752	0.134239	0.00746144
		R3	0.238302	0.00776638	0.00630077	0.0926759	0.123961	0.126737	0.0710728	0.199316	0.287347	0.135971	0.00883121	0.263508	0.36046	0.0725435	0.0991172	0.182251	0.195855	0.200121	0.00160762	0.0458949	0.0326116	0.00415458	0.217291	0.0013593	0.220133	0.00553222	0.248464	0.0179761	0.127915	0.0275224	0.17486	0.0304954	0.293302	0.114164	0.0335925	0.674046	0.0702888	0.0180719	0.0181084	0.00991296	0.0414298	0.389669	0.0840149	0.0302228	0.207866	0.129194	0.00229547
		R4	0.239485	0.00314911	0.00480561	0.141724	0.125453	0.143647	0.0334953	0.123886	0.327568	0.0677015	0.00982531	0.169675	0.398991	0.0516196	0.123533	0.147077	0.20604	0.129301	0	0.0177697	0.0308603	0.0275895	0.176537	0.00150943	0.164195	0.00088635	0.21955	0.0224414	0.124695	0.0139097	0.147433	0.036241	0.353014	0.0802798	0.00502746	0.59999	0.0252955	0.00928488	0.00107819	0.00495825	0.0027937	0.381956	0.0856262	0.0512557	0.239738	0.102242	0.00696202
		R5	0.164477	0.00265248	0.000423458	0.0621587	0.132195	0.0733751	0.0537857	0.183457	0.259189	0.0516513	0.00176854	0.137679	0.355411	0.0312002	0.0976011	0.174274	0.14258	0.140635	0	0.00319737	0.0199873	0.00358355	0.146318	0	0.114852	0	0.177173	0.00928104	0.11182	0.0162011	0.0816445	0.00469544	0.263787	0.061325	0.000155559	0.477381	0.0228208	0.00294476	1.023e-05	0.00439884	0.000697186	0.285003	0.0320666	0.00406755	0.0194993	0.1162	0.000685344
	U	R1	0.326452	0.304547	0.120879	0.37209	0.065881	0.113025	0.0594269	0.105552	-0.0759591	-0.0359597	-0.0645205	0.0209319	-0.061228	0.0103274	0.714034	-0.067944	0.714034	0.264589	0.220066	0.22549	0.236735	0.0084319	2.28929	-0.08	0.255695	0.0616065	0.268291	0.877716	0.0642006	0.143741	-0.00763387	-0.0605655	0.0061226	0.0562511	0.303151	0.513683	0.599279	0.104698	0.192411	-0.0630052	0.420797	0.0893952	0.25557	0.121766	0.131648	0.232372	0.207459
		R2	0.0202524	0.268682	0.00737673	0.238166	-0.0160885	-0.0710597	-0.0774176	-0.03139	-0.0799609	0.00383849	-0.0210407	-0.00581078	-0.076794	-0.0713038	0.134841	-0.0666451	0.134841	0.229837	0.0705831	0.149214	0.144821	0.0356952	0.317412	-0.08	0.218161	-0.027007	0.201831	0.557689	-0.0233288	0.148014	-0.0505501	-0.0789071	-0.0714723	0.00107002	0.180245	0.153304	0.270861	0.0309117	0.117278	-0.0591358	0.196043	0.0536303	0.362227	-0.0749251	0.0403794	0.210168	-0.0435443
		R3	-0.0113133	0.296674	0.0159919	0.178483	-0.0512495	-0.0769137	-0.079018	-0.0693131	-0.0799504	-0.0205353	-0.0620857	0.00967256	-0.0798635	-0.08	-0.0431323	-0.0731712	-0.0431323	0.209225	-0.0272805	0.176278	0.164992	-0.000327954	-0.038558	-0.08	0.0193507	-0.045936	0.195909	0.472998	-0.0444496	0.119152	-0.0675308	-0.08	-0.0728855	-0.00361509	0.1323	-0.00500269	0.273032	0.0325169	0.0476214	-0.07671	0.0176093	0.0528967	0.20439	-0.0788873	0.0211014	0.224283	-0.0773236
		R4	0.126134	0.34596	0.129694	0.211438	-0.0397187	-0.021917	-0.0778833	-0.0764503	-0.0799309	-0.0359082	-0.0503027	0.0144785	-0.08	-0.08	-0.0716722	-0.0498684	-0.0716722	0.196204	-0.0255045	0.218744	0.262171	0.00860524	0.00264523	-0.0799417	-0.0693237	-0.0648549	0.166505	0.457396	-0.0639996	0.130355	-0.0739046	-0.08	-0.0713812	-0.0310603	0.112895	0.025796	0.46484	0.0591654	0.0337804	-0.0775168	-0.015432	0.0626383	0.319351	-0.08	-0.0251241	0.2601	-0.0750414
		R5	0.193904	0.402288	0.096979	0.285612	-0.0371762	0.0485886	-0.077705	-0.0712712	-0.0777755	0.0387356	0.0129503	0.00600269	-0.0772331	-0.0799249	-0.0700056	-0.00726891	-0.0700056	0.238413	-0.00715955	0.238222	0.261532	0.0742304	0.285874	-0.0305437	0.117178	-0.049098	0.24314	0.444433	-0.0490075	0.166774	-0.0564871	-0.08	-0.078813	-0.00914207	0.148477	0.0936357	0.434276	0.102859	0.132941	-0.06648	0.0646832	0.0604286	0.390978	-0.08	0.0574783	0.329269	-0.0793095
c(right)		Face	2.31485	2.21146	2.0737	2.75524	2.36911	3.19968	2.59799	3.39956	3.76998	2.33996	1.99637	2.80246	2.87813	2.32735	2.64489	3.14414	2.00329	1.73299	2.5989	3.08388	2.39023	1.89395	2.146	2.86785	3.13184	2.86251	2.57118	2.0001	2.2313	1.70675	3.3046	3.06963	1.69228	2.24132	1.85756	2.20879	2.51311	2.65717	2.48051	2.77633	2.07701	2.46861	2.70166	2.29648	2.25569	1.44643	2.5323
		Object	1.94886	1.80787	1.9376	1.78793	2.49768	1.755	1.83943	2.30869	2.10285	2.86476	2.07321	2.31032	2.56973	2.43572	2.06088	1.77079	1.6807	2.3516	2.42763	2.25596	1.91889	2.14975	1.39421	1.63486	2.2243	2.5183	2.49742	1.60913	2.0726	2.28623	2.66966	1.98103	1.75453	1.46693	2.50714	1.53023	2.15061	1.75127	1.95368	1.80265	1.8283	1.46886	2.15922	2.17891	2.00576	2.20419	1.76978
		Face	2.80635	2.02064	1.15106	2.27123	1.44019	2.8929	3.30659	1.01684	2.54886	2.73693	2.67622	1.67339	1.86509	2.77249	2.75279	1.25095	1.80555	2.00468	3.39771	1.98655	2.18386	2.88426	1.86935	3.16086	2.21847	3.6573	2.66565	1.97024	1.41641	2.68297	1.5665	1.42617	2.57171	2.95991	2.62038	1.99235	3.08992	2.58164	2.77352	2.54262	1.47857	1.93792	1.89371	1.22116	1.76497	2.45183	2.20234
		Object	1.85496	2.66276	2.65843	1.3393	1.86399	2.58918	1.54463	1.33196	2.66149	1.87904	1.93767	1.72302	2.47358	2.63902	1.48903	1.92599	3.05103	1.99157	2.46288	2.86795	2.58515	2.3512	1.3148	1.53713	1.55597	1.51522	2.4782	2.50127	2.55189	2.30564	2.27681	2.13404	2.24598	2.14798	2.11027	2.01521	2.76159	1.93883	2.15958	2.3338	2.19181	1.62911	1.47123	2.12472	2.2852	1.94963	1.8833
		Face	1.99678	2.06877	1.76519	1.98835	2.32732	2.53981	1.80311	2.89713	2.25228	2.65997	2.7344	2.31371	2.36063	2.2212	2.42495	2.33595	2.87752	2.3795	2.45465	2.57721	2.07149	2.78107	2.42782	1.8364	1.90708	2.03204	3.281	2.52321	1.8152	2.5514	2.27037	2.25629	1.94066	1.9396	2.19665	1.78625	2.1468	2.26193	2.15074	2.28611	2.71666	2.26622	2.2983	1.89161	2.24196	2.36346	2.35576
		Object	1.92297	2.67729	2.25525	1.85959	1.66379	1.86703	2.41021	2.48055	2.51594	2.79629	3.03961	2.68289	2.83824	2.77975	2.41106	2.75631	2.88925	2.57978	2.48904	2.04988	3.15264	3.07072	3.44937	1.89796	2.44762	1.62649	2.9184	2.95451	2.76891	2.46295	2.67537	2.64471	1.9318	2.4548	2.25777	2.61599	2.38866	2.35082	1.99925	2.811	2.40584	2.71189	2.12681	2.82825	2.84108	2.83637	2.83643
		Face	1.64323	1.73707	2.16047	1.95266	2.00384	1.99807	2.38494	1.97017	1.8391	2.30516	2.00078	2.04697	2.01592	2.47408	2.13885	1.96861	1.85194	1.44038	2.09258	2.2189	1.88692	1.77187	1.8534	1.94425	2.24814	2.24218	2.24663	1.70324	2.28885	1.68036	1.81511	2.01354	1.71941	2.01038	1.68552	1.80957	1.77619	2.67323	2.03091	1.59686	2.11245	1.90544	1.80347	1.47431	1.94388	1.56718	1.64438
		Object	1.22324	2.75401	1.51995	1.98146	1.65983	2.05742	1.65603	1.41568	1.26787	2.01044	1.68862	1.75281	2.65962	1.30093	1.8494	1.5635	1.93133	1.39314	1.75933	1.69221	1.50687	1.61917	2.04326	1.38184	2.25806	1.85972	2.46555	1.49128	3.91067	2.98361	1.79505	1.53706	1.21475	2.5685	1.71472	2.15719	2.46631	1.46958	1.52236	1.60556	2.54618	2.98503	1.6141	1.80475	1.30446	1.06836	2.54789
		Face	2.99125	2.93663	1.41748	1.44863	1.90974	1.55602	1.86021	1.53007	3.17517	3.03284	3.42333	3.0336	2.73278	3.49006	2.09397	1.97085	1.98899	4.28491	1.6418	3.47066	1.44548	2.15284	2.0075	1.63607	1.6152	2.40736	1.48414	1.48127	2.26009	1.42651	2.96022	1.85597	1.70372	1.39536	2.64075	2.13338	2.75598	2.65297	1.97438	1.82663	2.57018	2.39318	2.59898	1.80675	3.18244	1.75618	1.95309
		Object	1.93416	2.60646	2.04691	1.48802	2.52312	1.9597	2.49654	1.95442	2.37292	1.7161	2.45384	2.01042	1.81194	1.63305	2.32423	2.32396	2.00575	1.40079	2.2437	2.39905	2.24824	2.36374	1.90986	3.18314	2.10602	2.12094	2.09606	2.74723	1.75724	1.98828	1.77281	2.69164	2.20588	2.35164	1.7867	1.83153	2.62887	2.12525	2.26092	2.11051	2.63932	2.12483	2.04552	1.68329	2.06416	2.59636	2.14665
[truncated: 151 more columns]
